# Supplementary material
Source: PubMed Central journal article supplement (PMC4426467)
Supplement: pnas.201421475SI.pdf [file pnas.201421475SI.pdf]

# Supporting Information

Qiao et al. 10.1073/pnas.1421475112

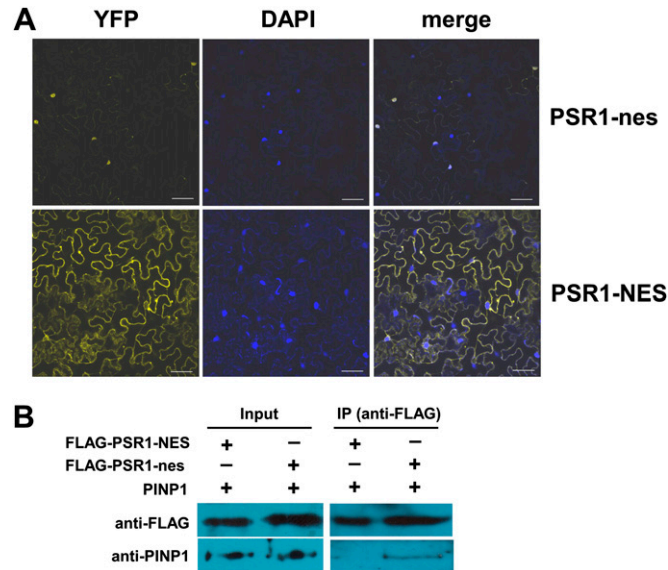

**Fig. S1.** Fusion to a NES impaired the interaction of PSR1 with PINP1 in plant cells. (A) Fusion to NES changed the localization of PSR1. Confocal microscopy of *N. benthamiana* epidermal cells showing the subcellular localization of PSR1-NES-YFP and PSR1-nes-YFP. DAPI staining was used to visualize the nuclei. Please note that the overall fluorescence was decreased to better visualize the predominant nuclear localization of PSR1-nes-YFP; the nuclear localization was completely lost by PSR1-NES-YFP. (Scale bars: 50  $\mu$ m.) (B) Coimmunoprecipitation of PSR1-NES or PSR1-nes with PINP1. The 3 $\times$ -FLAG-PSR1-NES/nes and PINP1 were coexpressed in *N. benthamiana*. The protein complex was pulled down by using anti-FLAG resins, and the enrichment of PINP1 was detected by an anti-PINP1 antiserum. This experiment was repeated twice with similar results.



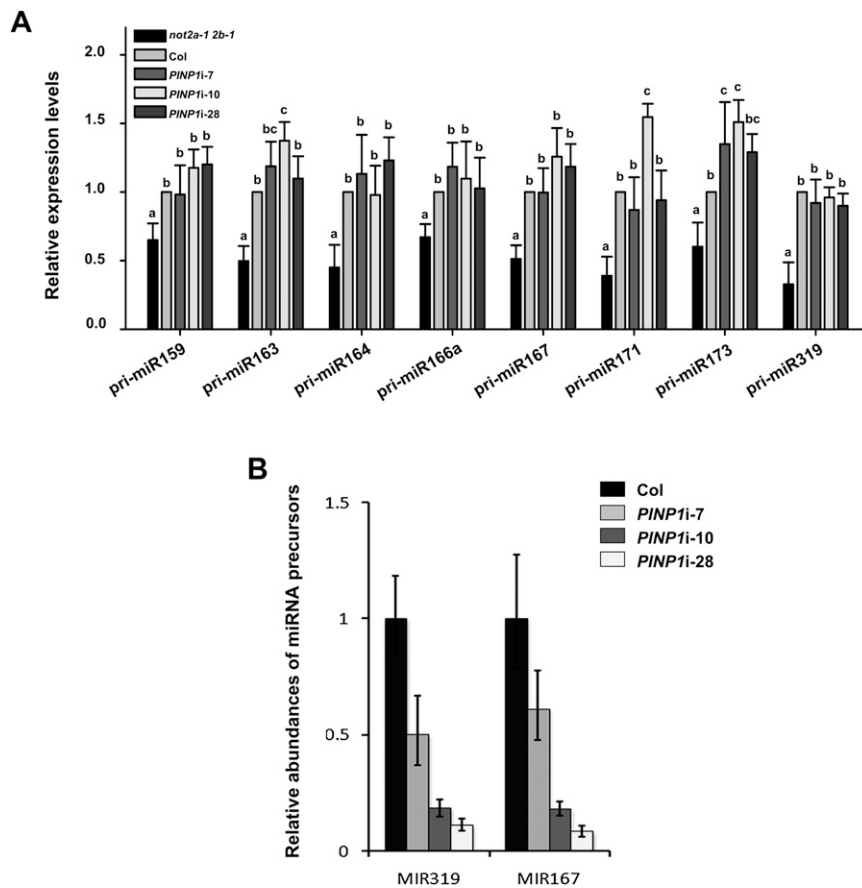

**Fig. S3.** PNP1 affects the pre-miRNA, but not pri-miRNA, levels. (A) Silencing of *PINP1* does not interfere with the transcription of *MIR* genes. Transcript abundances of pri-miRNAs in wild-type (Col-0), *PINP1*-silenced plants, and the *not2a-1 2b-1* mutant were determined by qRT-PCR. *AtUBQ10* was used as the internal standard. Values are means  $\pm$  SDs (as error bars) from three independent replicates. Letters represent differences with statistical significance ( $P < 0.05$ ) as determined by Duncan's multiple range test. (B) Levels of miR319 and miR167 precursors were determined by qRT-PCR in wild-type (Col-0) and *PINP1*-silenced plants. Primers were designed to anneal to the stem portion of the hairpins to amplify the reverse-transcribed products of both pri-miRNAs and pre-miRNAs. Because the abundances of pri-miR167 and pri-miR319 remain unchanged in *PINP1*-silenced plants (Fig. 2D), the decreased levels of miRNA precursors observed here were presumably due to lower levels of pre-miRNAs. This experiment was repeated twice with similar results.

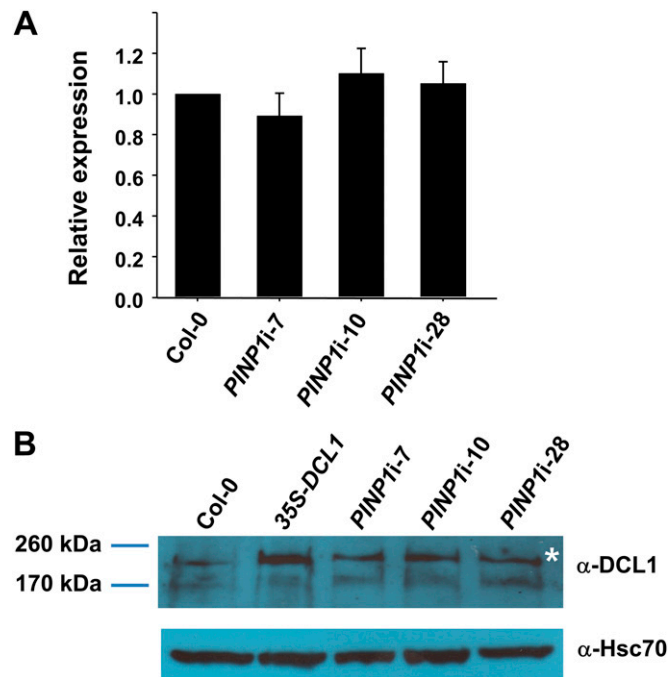

**Fig. 54.** Transcript and protein levels of DCL1 in *PINP1*-silenced plants. (A) *dcl1* transcript levels were determined by qRT-PCR in wild-type (Col-0) and *PINP1*-silenced lines. (B) DCL1 protein abundances were determined by Western blotting using an anti-DCL1 antibody (Agriser) in wild-type (Col-0), *p35S-DCL1*, and *PINP1*-silenced plants. \* labels the protein band corresponding to DCL1 with a predicted molecular mass of 210 kDa. Hsc70 was detected by using an anti-Hsc70 antibody as a loading control. Protein sample extracted from *Arabidopsis* plants overexpressing DCL1 was used as a control. This experiment was repeated twice with similar results.

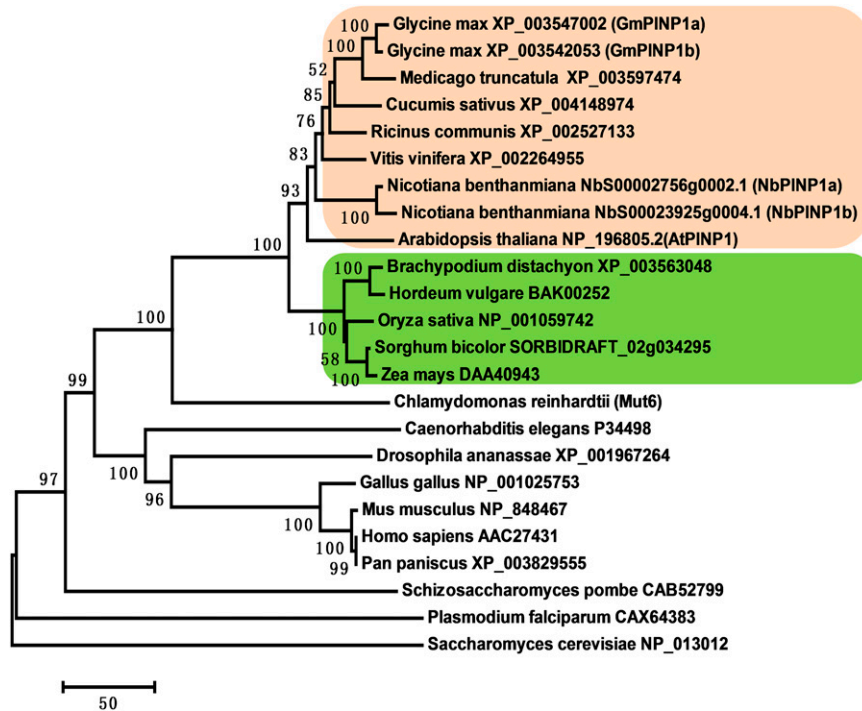

**Fig. 55.** Phylogenetic analysis of PINP1 homologs in fungi, plants, and animals. Neighbor-joining tree of 24 PINP1 homologs, all containing the DEAH-box RNA helicase domain, was constructed by using full-length amino acid sequences. The clade containing PINP1 homologs in dicots is highlighted in yellow, and the clade with PINP1 homologs in monocots is highlighted in green. The soybean homologs GmPINP1a and GmPINP1b can also interact with PSR1 (Fig. 1A).

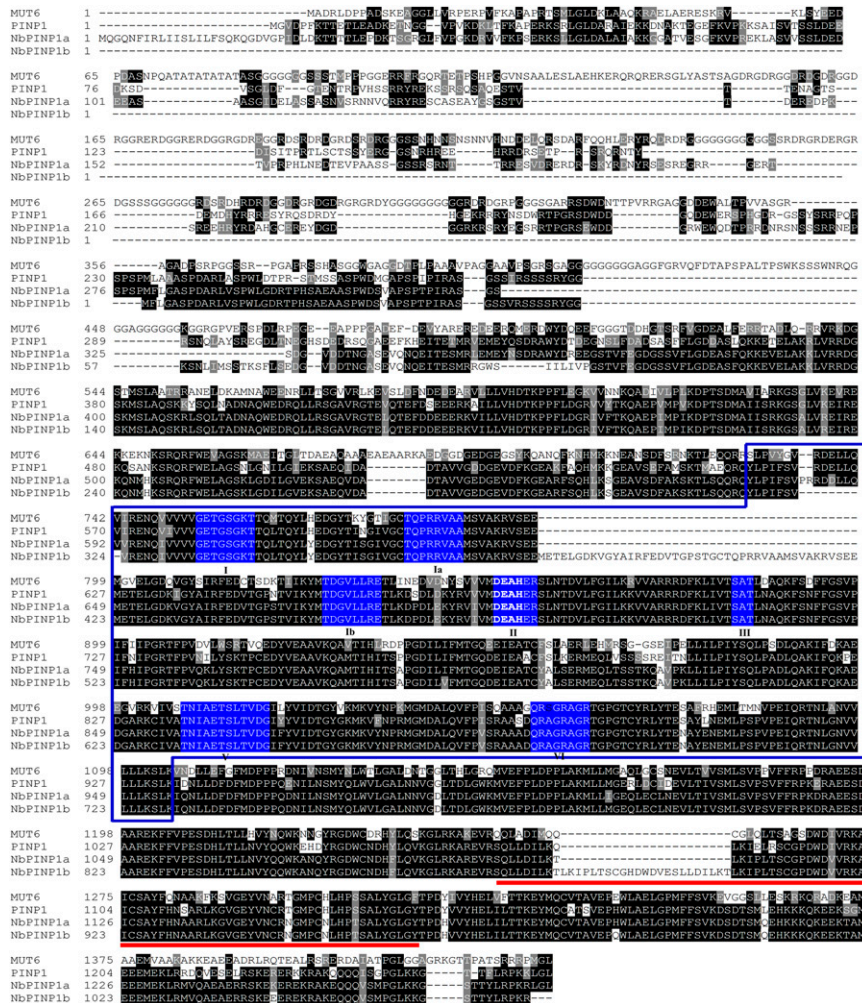

**Fig. S6.** Amino acid sequence alignment of MUT6 and P1NP1 homologs in *Arabidopsis* (PINP1) and in *N. benthamiana* (NbPINP1a and NbPINP1b). The blue box denotes the DEAH RNA helicase domain, and the conserved motifs are highlighted in blue. The red line labels the region of a conserved DUF1605 domain with unknown functions. Identical residues are shaded in black, and similar residues are shaded in gray.

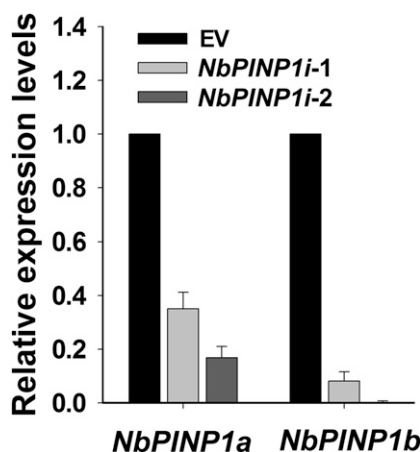

**Fig. S7.** qRT-PCR analysis of the transcript abundances of *NbPINP1a* and *NbPINP1b* in *N. benthamiana* inoculated with *Agrobacterium* harboring either the empty VIGS vector TRV2-LIC (EV) or TRV2-LIC carrying the silencing constructs *NbPINP1i-1* or *NbPINP1i-2*. 18S rRNA was used as the internal standard. Error bars are SEs of three biological replicates. This experiment was repeated twice with similar results.

**Table S1. Characterization of T-DNA mutants of *PIN1* in *Arabidopsis* eco. Col-0**

| T-DNA lines | Homozygous plants | Heterozygous plants | Wild-type | $\chi^2$ (2:1) | P value |
|-------------|-------------------|---------------------|-----------|----------------|---------|
| CS24359     | 0                 | 35                  | 18        | 0.01           | 0.9203  |
| SALK_062354 | 0                 | 38                  | 18        | 0.02           | 0.8875  |
| SALK_019541 | 0                 | 34                  | 17        | 0.00           | 1.0000  |

**Table S2. Strains and plasmids used in this study**

| Strains or plasmids                            | Description                                                                                                                                                                | Source                     |
|------------------------------------------------|----------------------------------------------------------------------------------------------------------------------------------------------------------------------------|----------------------------|
| <i>E. coli</i> DH5 $\alpha$                    | F- $\Phi$ 80d <i>lacZ</i> $\Delta$ M15 $\Delta$ ( <i>lacZYA-argF</i> ) U169 <i>recA1 endA1, hsdR17</i> (rk-, mk+) <i>phoA supE44</i> $\lambda$ - <i>thi-1 gyrA96 relA1</i> | Invitrogen                 |
| <i>E. coli</i> BL21(DE3)                       | F- <i>ompT gal dcm lon hsdSB</i> (rB- mB -) $\lambda$ (DE3 [ <i>lacI lacUV5-T7 gene 1 ind1 sam7 nin5</i> ])                                                                | Invitrogen                 |
| <i>Agrobacterium tumefaciens</i> GV3101(pMP90) | Deletion of T-DNA of pTiC58, Rif <sup>R</sup> , Gent <sup>R</sup>                                                                                                          | Holsters (1)               |
| <i>A. tumefaciens</i> C58C1 (pCH32)            | Rif <sup>R</sup> , Tet <sup>R</sup>                                                                                                                                        | Mudgett et al. (2)         |
| <i>P. infestans</i> isolate 1306               | Tomato and potato pathogen, can infect <i>N. benthamiana</i>                                                                                                               | Cvitanich and Judelson (3) |
| <i>Phytophthora capsici</i> strain LT263       | Isolated from pumpkin, can infect <i>Arabidopsis</i>                                                                                                                       | Donahoo and Lamour (4)     |
| pEG100                                         | pEarleyGate100, a Gateway binary vector with cauliflower mosaic virus 35S promoter, Kan <sup>R</sup>                                                                       | Earley et al. (5)          |
| pEG100::PSR1A                                  | pEG100 carrying <i>PSR1A</i> , Kan <sup>R</sup>                                                                                                                            | This study                 |
| pEG100::3 $\times$ FLAG-PSR1                   | pEG100 carrying <i>PSR1</i> tagged with 3 $\times$ FLAG at N terminus, Kan <sup>R</sup>                                                                                    | This study                 |
| pEG100::3 $\times$ FLAG-PSR1-NES               | pEG100 carrying <i>PSR1-NES</i> (LALKLAGLDI) tagged with 3 $\times$ FLAG at N terminus, Kan <sup>R</sup>                                                                   | This study                 |
| pEG100::3 $\times$ FLAG-PSR1-nes               | pEG100 carrying <i>PSR1-nes</i> (LALKAAGADA) tagged with 3 $\times$ FLAG at N terminus, Kan <sup>R</sup>                                                                   | This study                 |
| pEG100::3 $\times$ FLAG-PSR1A                  | pEG100 carrying <i>PSR1A</i> tagged with 3 $\times$ FLAG at N terminus, Kan <sup>R</sup>                                                                                   | This study                 |
| pEG100::3 $\times$ FLAG-PSR1M                  | pEG100 carrying <i>PSR1M</i> tagged with 3 $\times$ FLAG at N terminus, Kan <sup>R</sup>                                                                                   | This study                 |
| pEG100::amiRPINP1                              | pEG100 carrying amiRNA for <i>PINP1</i> silencing, Kan <sup>R</sup>                                                                                                        | This study                 |
| pENTR1A                                        | An entry vector for gateway system, Kan <sup>R</sup>                                                                                                                       | Invitrogen                 |
| pENTR1A::PSR1A                                 | pENTR/b-TOPO carrying the <i>PSR1</i> gene, Kan <sup>R</sup>                                                                                                               | This study                 |
| pENTR1A::3XFLAG-PSR1                           | pENTR/b-TOPO carrying the <i>PSR1</i> gene with 3 $\times$ FLAG tag at the N terminus, Kan <sup>R</sup>                                                                    | This study                 |
| pENTR1A::3XFLAG-PSR1A                          | pENTR/b-TOPO carrying the <i>PSR1A</i> gene with 3 $\times$ FLAG tag at the N terminus, Kan <sup>R</sup>                                                                   | This study                 |
| pENTR1A::3XFLAG-PSR1M                          | pENTR/b-TOPO carrying the <i>PSR1M</i> gene with 3 $\times$ FLAG tag at the N terminus, Kan <sup>R</sup>                                                                   | Qiao et al. (6)            |
| pENTR1A::PINP1                                 | pENTR/b-TOPO carrying the <i>PINP1</i> gene, Kan <sup>R</sup>                                                                                                              | This study                 |
| pEG101                                         | pEarleyGate101, a Gateway binary vector carrying cauliflower mosaic virus (CaMV) 35S promoter and <i>YFP</i> , Kan <sup>R</sup>                                            | Earley et al. (5)          |
| pEG101::PSR1                                   | pEG101 carrying <i>PSR1</i> in-frame fused to <i>YFP</i> , Kan <sup>R</sup>                                                                                                | Qiao et al. (6)            |
| pEG101::PINP1                                  | pEG101 carrying <i>PINP1</i> in-frame fused to <i>YFP</i> , Kan <sup>R</sup>                                                                                               | This study                 |
| pEG104                                         | pEarleyGate104, a Gateway binary vector carrying <i>P35S-YFP</i> , Kan <sup>R</sup>                                                                                        | Earley et al. (5)          |
| pEG301                                         | pEarleyGate301, a Gateway binary vector without a promoter, Kan <sup>R</sup>                                                                                               | Earley et al. (5)          |
| pEG301-pUBQ10::PSR1                            | pEG301 carrying <i>PSR1</i> with the UBQ10 promoter, Kan <sup>R</sup>                                                                                                      | This study                 |
| pEG301-pUBQ10::amiRPINP1                       | pEG301 carrying an amiRNA for <i>PINP1</i> silencing with the UBQ10 promoter, Kan <sup>R</sup>                                                                             | This study                 |
| pGEX4T-2                                       | <i>E. coli</i> expression vector with a C-terminal GST tag, Amp <sup>R</sup>                                                                                               | Amersham                   |
| pGEX4T-2::PSR1                                 | pGEX4T-2 carrying <i>PSR1</i> which expresses GST-PSR1, Amp <sup>R</sup>                                                                                                   | This study                 |
| pET-mal                                        | <i>malE</i> gene from pMAL-c2 is cloned into NdeI-XhoI site of pET28a, Kan <sup>R</sup>                                                                                    | Sweeney et al. (7)         |
| pET-mal::PINP1                                 | pET-mal carrying <i>PINP1</i> , Kan <sup>R</sup>                                                                                                                           | This study                 |
| pGBKT7                                         | A yeast bait vector expressing proteins fused to the GAL4 DNA binding domain, Kan <sup>R</sup>                                                                             | Clontech                   |
| pGBKT7::PSR1                                   | pGBKT7 carrying <i>PSR1</i> , Kan <sup>R</sup>                                                                                                                             | This study                 |
| pGADT7                                         | A yeast prey vector expressing proteins fused to the GAL4 activation domain, Amp <sup>R</sup>                                                                              | Clontech                   |
| pGADT7::PINP1                                  | pGADT7 carrying <i>PINP1</i> , Amp <sup>R</sup>                                                                                                                            | This study                 |
| pGADT7::GmPINP1a                               | pGADT7 carrying <i>GmPINP1a</i> , Amp <sup>R</sup>                                                                                                                         | This study                 |
| pGADT7::GmPINP1b                               | pGADT7 carrying <i>GmPINP1b</i> , Amp <sup>R</sup>                                                                                                                         | This study                 |
| pSPYNE                                         | A binary vector carrying CaMV 35S promoter and the N-terminal (1-155 aa) domain of <i>YFP</i> for BiFC analysis, Kan <sup>R</sup>                                          | Walter et al. (8)          |
| pSPYCE                                         | A binary vector carrying CaMV 35S promoter and the C-terminal (156-239 aa) domain of <i>YFP</i> for BiFC analysis, Kan <sup>R</sup>                                        | Walter et al. (8)          |
| pSPYNE::PSR1                                   | pSPYNE carrying <i>PSR1</i> in frame fused with nYFP, Kan <sup>R</sup>                                                                                                     | This study                 |
| pSPYNE::PSR1A                                  | pSPYNE carrying <i>PSR1A</i> in frame fused with nYFP, Kan <sup>R</sup>                                                                                                    | This study                 |
| pSPYNE::PSR1M                                  | pSPYNE carrying <i>PSR1M</i> in frame fused with nYFP, Kan <sup>R</sup>                                                                                                    | This study                 |
| pSPYCE::PINP1                                  | pSPYCE carrying <i>PINP1</i> in frame fused with cYFP, Kan <sup>R</sup>                                                                                                    | This study                 |
| TRV1                                           | A VIGS vector with 2 $\times$ 35S promoter and the cDNA sequence of TRV strain Ppk20 RNA1, Kan <sup>R</sup>                                                                | Dong et al. (9)            |
| TRV2-LIC                                       | A VIGS vector with 2 $\times$ 35S promoter and the cDNA sequence of TRV strain Ppk20 RNA2, Kan <sup>R</sup>                                                                | Dong et al. (9)            |
| TRV2::NbPINP1i-1                               | TRV2 carrying fragment 1 between <i>NbPINP1a/b</i> genes for gene silencing, Kan <sup>R</sup>                                                                              | This study                 |
| TRV2::NbPINP1i-2                               | TRV2 carrying fragment 2 between <i>NbPINP1a/b</i> genes for gene silencing, Kan <sup>R</sup>                                                                              | This study                 |

- Holsters M, et al. (1980) The functional organization of the nopaline *A. tumefaciens* plasmid pTiC58. *Plasmid* 3(2):212–230.
- Mudgett MB, et al. (2000) Molecular signals required for type III secretion and translocation of the *Xanthomonas campestris* AvrBs2 protein to pepper plants. *Proc Natl Acad Sci USA* 97(24):13324–13329.
- Cvitanich C, Judelson HS (2003) Stable transformation of the oomycete, *Phytophthora infestans*, using microprojectile bombardment. *Curr Genet* 42(4):228–235.
- Donahoo RS, Lamour KH (2008) Interspecific hybridization and apomixis between *Phytophthora capsici* and *Phytophthora tropicalis*. *Mycologia* 100(6):911–920.
- Earley KW, et al. (2006) Gateway-compatible vectors for plant functional genomics and proteomics. *Plant J* 45(4):616–629.
- Qiao Y, et al. (2013) Oomycete pathogens encode RNA silencing suppressors. *Nat Genet* 45(3):330–333.
- Sweeney MC, et al. (2005) Decoding protein-protein interactions through combinatorial chemistry: Sequence specificity of SHP-1, SHP-2, and SHP SH2 domains. *Biochemistry* 44(45):14932–14947.
- Walter M, et al. (2004) Visualization of protein interactions in living plant cells using bimolecular fluorescence complementation. *Plant J* 40(3):428–438.
- Dong Y, Burch-Smith TM, Liu Y, Mamillapalli P, Dinesh-Kumar SP (2007) A ligation-independent cloning tobacco rattle virus vector for high-throughput virus-induced gene silencing identifies roles for NbMADS4-1 and -2 in floral development. *Plant Physiol* 145(4):1161–1170.

**Table S3. Primers used in this study**

| Experiment      | Primer name           | Primer sequence (5' to 3')           |
|-----------------|-----------------------|--------------------------------------|
| Y2H             | AD-PINP1 EcoRI-F      | CTACGAATTCATGGGGGTTGATCCATTCAAACCTA  |
|                 | AD-PINP1 XhoI-R       | CTACCTCGAGTCACAGTCCAAGCTTCTTAGGCCTG  |
|                 | BD-PSR1-EcoRI-F       | CTACGAATTCATGACTAAACCGTCGACGGAGGC    |
|                 | BD-PSR1-BamHI-R       | CTACGGATCCGTCAATTGTTCTAGCCACGCCT     |
|                 | AD-GmPINP1a-EcoRI-F   | CTACGAATTCATGGAGAAGGATGGAGCTGGAGCTG  |
|                 | AD-GmPINP1a-ClaI-R    | CTACATCGATTTTACAACCAAACTTCTTTGGTCTC  |
|                 | AD-GmPINP1b-EcoRI-F   | CTACGAATTCATGGAGAAGGATGGAAGTGGTGCTG  |
|                 | AD-GmPINP1b-ClaI-R    | CTACATCGATTTTACAACCAAACTTCTTTGGCCTC  |
| Pull-down assay | GST-PSR1-BamHI-F      | CTACGGATCCATGACTAAACCGTCGACGGAGGC    |
|                 | GST-PSR1-EcoRI-R      | CTACGAATTCGTCAATTGTTCTAGCCACGCCT     |
|                 | MBP-PINP1-EcoRI-F     | CTACGAATTCATGGGGGTTGATCCATTCAAACCTA  |
|                 | MBP-PINP1-XhoI-R      | CTACCTCGAGTCACAGTCCAAGCTTCTTAGGCCTG  |
| BiFC assay      | pSPYNE-PSR1-XbaI-F    | CTACTCTAGAATGACTAAACCGTCGACGGA       |
|                 | pSPYNE-PSR1-KpnI-R    | CTACGGTACCTTGTCTTAGCCACGCCTTGT       |
|                 | pSPYCE-PINP1-SalI-F   | CTACGTCGACATGGGGGTTGATCCATTCAAACCTA  |
|                 | pSPYCE-PINP1-KpnI-R   | CTACGGTACCCAGTCCAAGCTTCTTAGGCCTGAGG  |
| Co-IP assay     | pENTR-PINP1-SalI-F    | CTACGTCGACATGGGGGTTGATCCATTCAAACCTA  |
|                 | pENTR-PINP1-XhoI-R    | CTACCTCGAGTGCAGTCCAAGCTTCTTAGGCCTG   |
|                 | TSK108-PSR1-EcoRI-F   | CTACGAATTCATGACTAAACCGTCGACGGA       |
| VIGS assay      | TSK108-PSR1-XbaI-R    | CTACTCTAGATCATTGTTCTAGCCACGCCT       |
|                 | NbPINP1-VIGS1-F       | CGACGACAAGACCCTGCTGCATCTTCTGGGAGTTC  |
|                 | NbPINP1-VIGS1-R       | GAGGAGAAGAGCCCTTGGAAACGATTATCACGACGA |
|                 | NbPINP1-VIGS2-F       | CGACGACAAGACCCTCGTGTGGCAGCTATGAGTGT  |
| qRT-PCR         | NbPINP1-VIGS2-R       | GAGGAGAAGAGCCCTTGGAGAATTTTTGGGCATT   |
|                 | AGO1-F                | TGGACCACCGCAGAGACAAT                 |
|                 | AGO1-R                | CATCATACGCTGGAAGACGACT               |
|                 | CUC2-F                | TTTTCTCGTTTCGTTTCTA                  |
|                 | CUC2-R                | TCCAATACAGTCAAGTCCA                  |
|                 | PHV-F                 | CAAGGCTACAGGAACCTC                   |
|                 | PHV-R                 | TGAGGATTTACAGCACCT                   |
|                 | SCL6-F                | ACTCAAGACAACCTCAAGCA                 |
|                 | SCL6-R                | GATAGATGCTTACAGAAACG                 |
|                 | SPL10-F               | TGAGACAAAGCCTACACAGATGGA             |
|                 | SPL10-R               | GATGATGCAACCCGACTTTTTTATG            |
|                 | At4G27990-F           | CCGTCAAGTAATGAAACAC                  |
|                 | At4G27990-R           | TGGGATACAGAAGTCAACAA                 |
|                 | At1G12775-F           | GCTTTTTCTACTATGGGGAAG                |
|                 | At1G12775-R           | ATGAGAGTGGGTTTATGTCC                 |
|                 | ARF3-F                | GGTGGCCTGGTTCAAATGGAG                |
|                 | ARF3-R                | CGGAAGAGGGTGATGATGATAC               |
|                 | NbPINP1a/b-F          | AGGGACTTGTACCCTGTTT                  |
|                 | NbPINP1a/b-R          | TAGCCGCATCACTTCTCTCT                 |
|                 | NbPINP1a-F            | CCTGGTATGACCGAGAAGAA                 |
|                 | NbPINP1a-R            | CAAACCTCCGTCTGCAACTCA                |
|                 | NbPINP1b-F            | TTTTCTGTCCGAGGATGGAG                 |
|                 | NbPINP1b-R            | CGATCTCCCATTTGAGCATT                 |
|                 | Nb18S-rRNA-F          | TGACGGAGAATTAGGGTTTCG                |
|                 | Nb18S-rRNA-R          | CCTCCAATGGATCCTCGTTA                 |
|                 | PINP1-RT-F            | ACATGACCGATGGAGTACTACTGA             |
|                 | PINP1-RT-R            | TCTACTGGAAGATGATACGAGCTG             |
|                 | AtUBQ10-F             | AAATCTCGTCTCTGTTATGCTTAAGAAG         |
|                 | AtUBQ10-R             | AAAGAGATAACAGGAACGGAAACATAGT         |
|                 | DCL1-F                | AATGGGCATCAGCCGTTTACGAGA             |
|                 | DCL1-R                | AAATCTTTGCATGAGCCGGTCC               |
|                 | premiR319-F           | TGAGTCCATTCACAGGTCTGT                |
|                 | premiR319-R           | TGGCGACTCGGTATTTGGAT                 |
|                 | premiR167-F           | TGTTGTGTTTCATGACGATGGT               |
|                 | premiR167-R           | CAACGGGTGAACTGCGAA                   |
|                 | pri-miR159-F          | GGAGCTCTACTTCCATCGTCA                |
| pri-miR159-R    | CCACGTTCTCATCAAACCTTT |                                      |
| pri-miR163-F    | GCATAGGTCTTGATTGGTGGA |                                      |
| pri-miR163-R    | CGTTGTCGTTGAAGAGGTTG  |                                      |
| pri-miR164-F    | CCATTGACGATTGCATCCTCG |                                      |



**Table S3. Cont.**

| Experiment                | Primer name                    | Primer sequence (5' to 3')            |
|---------------------------|--------------------------------|---------------------------------------|
| miRNA Northern blotting   | pri-miR164-R                   | TTGATGGAGAAGCAGGGCAC                  |
|                           | pri-miR166a-F                  | CACCACTCACTTATCTTCTTC                 |
|                           | pri-miR166a-R                  | CAGTCGAAATTATAGAATCTAGGGT             |
|                           | pri-miR167-F                   | GAAGCTGCCAGCATGATCTA                  |
|                           | pri-miR167-R                   | GGGTTTATAGAAGGGTGCGA                  |
|                           | pri-miR171-F                   | CCGCGCCAATATCTCAGTA                   |
|                           | pri-miR171-R                   | TGTCTCCATTTCAACACACACA                |
|                           | pri-miR173-F                   | CTTCTTCTCACAATAAACCCA                 |
|                           | pri-miR173-R                   | AAGATCTCTAACATTAATCAT                 |
|                           | pri-miR319-F                   | AGAGGTTAGCATGTTGATGAC                 |
|                           | pri-miR319-R                   | CCTCAAGTTATCATATCGGAG                 |
|                           | miR159                         | TAGAGCTCCCTTCAATCCAAA                 |
|                           | miR167                         | TAGATCATGTTGGCAGTTTCA                 |
|                           | miR164                         | TGCACGTGCCCTGCTTCTCCA                 |
|                           | miR171                         | CGTGATATTGGCACGGCTCAA                 |
|                           | ASRP255                        | TACGCTATGTTGGACTTAGAA                 |
|                           | ASRP1151                       | AAGTATCATCATTCGCTTGGGA                |
|                           | ASR5D8                         | AAAGGCCTTACAAGGTCAAGA                 |
|                           | miR173                         | GTGATTTCTCTCTGTAAGCGA                 |
|                           | miR393                         | GATCAATGCGATCCCTTGGGA                 |
|                           | miR166                         | GGGGAATGAACGCTGTTTCGCT                |
|                           | miR390                         | GGCGCTATCCCTCCTGAGCTT                 |
|                           | miR168                         | TTCCCGACCTGCACCAAGCGA                 |
|                           | siR1003                        | ATGCCAAGTTTGGCCTCACCGTC               |
|                           | AtSN1                          | ACCAACGTGTTGTTGGCCAGTGGTAAATCTCTCAGAT |
|                           | SimpleHAT2                     | TGGGTACCATTTTGACACCCCTA               |
| Cluster4                  | AAGATCAAACATCAGCAGCGTCAGAGGCTT |                                       |
| U6                        | AGGGGCCATGCTAATCTTCTC          |                                       |
| Silencing of <i>PINP1</i> | amiRPINP1                      | TCAGTATTCCAAAAGGACGT                  |
| NES                       | NES                            | CTGGCTTTGAAGTTAGCTGGTTGGATATC         |
|                           | nes                            | CTTGCTTTAAGGCGGCTGGAGCTGATGCT         |

For PSR1, PSR1A, and PSR1M, the same primer sets were used in each experiment.
